# Supplementary material for: Catalytic Reduction of Dyes and Antibacterial Activity of AgNPs@Zn@Alginate Composite Aerogel Beads
Source: MDPI journal article supplement (doi:10.3390/polym14224829), 2022-11-09
Supplement: s1 [file s1]

## Catalytic reduction of dyes and antibacterial activity of AgNPs@Zn@Alginate composite aerogel beads.

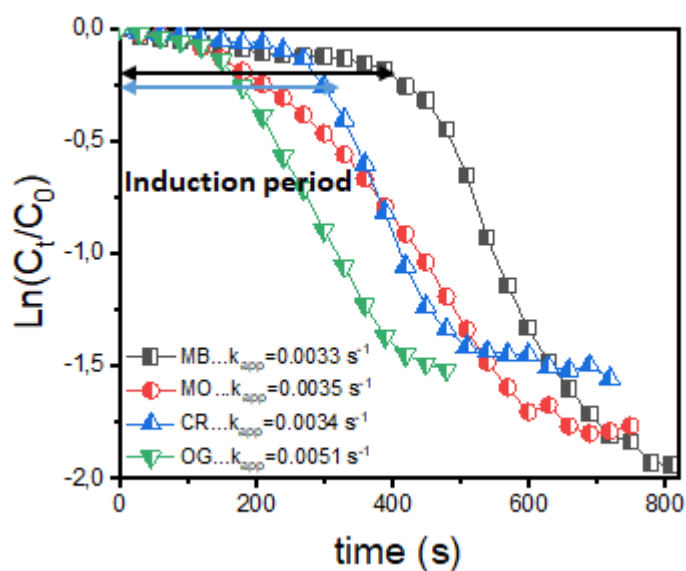

Figure S1. Plot of  $\ln(C_t/C_0)$  versus time.

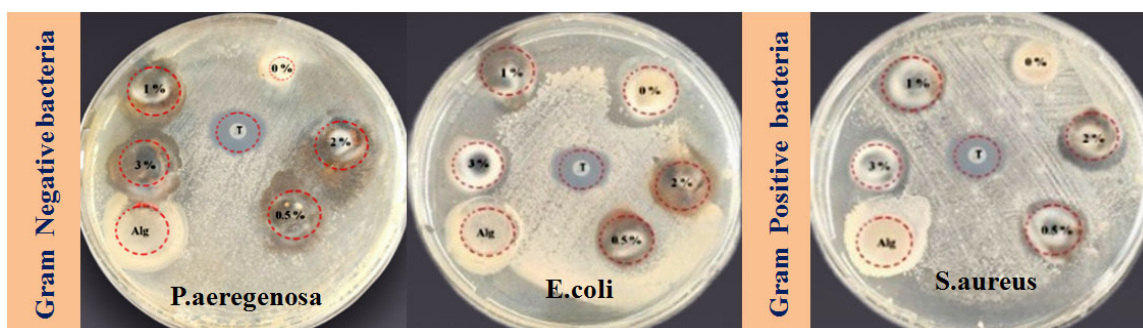

Figure S2. Digital images for antibacterial tests of different samples of Zn-ALG(AgNPs).

**Table S1.** Comparative study with materials carried out in the literature.

|           | catalyst                                    | Catalyst mass (mg)     | [dye] (mM) | [NaBH <sub>4</sub> ] | Reaction time (min) | k <sub>app</sub> (min <sup>-1</sup> ) | Ref               |
|-----------|---------------------------------------------|------------------------|------------|----------------------|---------------------|---------------------------------------|-------------------|
| <b>MB</b> | Alg-St/AC1@CuNPs                            | 30 mg                  | 0.08       | 0.2 M                | 2.5 min             | 0.73                                  | [31]              |
|           | Alg-St/AC5@CuNPs                            | 30 mg                  | 0.08       | 0.2 M                | 6.5 min             | 0.19                                  | [31]              |
|           | Alg-St/AC10@CuNPs                           | 30 mg                  | 0.08       | 0.2M                 | 5 min               | 0.3                                   | [31]              |
|           | Ag <sup>0</sup> /CH/PG                      | 0.1g                   | 0.07       | 0.2M                 | 25 min              | //                                    | [34]              |
|           | <b>Zn-ALG(Ag 0.5%)</b>                      | 5.3mg                  | 0.1        | 8mM                  | 7.5 min             | 0.198                                 | <b>This study</b> |
| <b>CR</b> | Alg-St/AC1@CuNPs                            | 30 mg                  | 0.08       | 0.2 M                | 8 min               | 0.13                                  | [31]              |
|           | Alg-St/AC5@CuNPs                            | 30 mg                  | 0.08       | 0.2 M                | 7 min               | 0.13                                  | [31]              |
|           | Alg-St/AC10@CuNPs                           | 30 mg                  | 0.08       | 0.2M                 | 4 min               | 0.36                                  | [31]              |
|           | Fe <sup>0</sup> -Cu <sup>0</sup> /Alg-ACBDs | 9.5 mg                 | 0.07       | 0.2 M                | 6 min               | 0.655                                 | [37]              |
|           | CuAg@BP-NaY                                 | 1 ×0.5 cm <sup>2</sup> | 0.05       | 0.1 M                | 4 min               | 0.64                                  | [33]              |
|           | Ag@BP-NaY                                   | 1 ×0.5 cm <sup>2</sup> | 0.05       | 0.1 M                | 5 min               | 0.46                                  | [33]              |
|           | Cu@BP-NaY                                   | 1 ×0.5 cm <sup>2</sup> | 0.05       | 0.1 M                | 7 min               | 0.31                                  | [33]              |
|           | <b>Zn-ALG(Ag 0.5%)</b>                      | 5.3mg                  | 0.1        | 8mM                  | 12.5min             | 0.204                                 | <b>This study</b> |
| <b>MO</b> | Fe <sup>0</sup> -Cu <sup>0</sup> /Alg-ACBDs | 9.5mg                  | 0.07       | 0.2 M                | 4 min               | 1.163                                 | [37]              |
|           | Ag <sup>0</sup> /CH/PG                      | 0.1g                   | 0.07       | 0.2 M                | 10min               | //                                    | [34]              |
|           | CuAg@BP-NaY                                 | 1 ×0.5 cm <sup>2</sup> | 0.05       | 0.1 M                | 2 min               | 1.75                                  | [33]              |
|           | Ag@BP-NaY                                   | 1 ×0.5 cm <sup>2</sup> | 0.05       | 0.1 M                | 4 min               | 0.78                                  | [33]              |
|           | Cu@BP-NaY                                   | 1 ×0.5 cm <sup>2</sup> | 0.05       | 0.1 M                | 5 min               | 0.64                                  | [33]              |
|           | <b>Zn-ALG(Ag 0.5%)</b>                      | 5.3mg                  | 0.1        | 8mM                  | 12.5 min            | 0.21                                  | <b>This study</b> |
|           | MC@CA(1) hydrogel beads                     | 4.8mg                  | 0.6        | 0.6M                 | 14min               | //                                    | [36]              |
| <b>OG</b> | MC@CA(1) aerogel beads                      | 4.8mg                  | 0.6        | 0.6M                 | 14 min              | //                                    | [36]              |
|           | <b>Zn-ALG(Ag 0.5%)</b>                      | 5.3mg                  | 0.1        | 8mM                  | 8min                | 3.267                                 | <b>This study</b> |
